# Supplementary material
Source: publisher figshare collection journal article supplement (https://acs.figshare.com/ndownloader/files/4582699)

Supporting information for

***N*-Heterocyclization of Naphthylamines with 1,2- and 1,3-Diols Catalyzed  
by Iridium Chloride/BINAP System**

Hiroomi Aramoto, Yasushi Obora, and Yasutaka Ishii\*

*Department of Chemistry and Materials Engineering, Faculty of Chemistry,  
Materials and Bioengineering & High Technology Research Center, Kansai  
University, Suita, Osaka 564-8680, Japan*

**Table of Contents**

|      |                                                                                                         |
|------|---------------------------------------------------------------------------------------------------------|
| S2:  | General Experimental Methods                                                                            |
| S3:  | Copies of <sup>1</sup> H (400 MHz, CDCl <sub>3</sub> ) and <sup>13</sup> C NMR spectra for <b>3aa</b> . |
| S4:  | Copies of <sup>1</sup> H (400 MHz, CDCl <sub>3</sub> ) and <sup>13</sup> C NMR spectra for <b>3ab</b> . |
| S5:  | Copies of <sup>1</sup> H (400 MHz, CDCl <sub>3</sub> ) and <sup>13</sup> C NMR spectra for <b>3ac</b> . |
| S6:  | Copies of <sup>1</sup> H (400 MHz, CDCl <sub>3</sub> ) and <sup>13</sup> C NMR spectra for <b>3ad</b> . |
| S7:  | Copies of <sup>1</sup> H (400 MHz, CDCl <sub>3</sub> ) and <sup>13</sup> C NMR spectra for <b>3ae</b> . |
| S8:  | Copies of <sup>1</sup> H (400 MHz, CDCl <sub>3</sub> ) and <sup>13</sup> C NMR spectra for <b>3ba</b> . |
| S9:  | Copies of <sup>1</sup> H (400 MHz, CDCl <sub>3</sub> ) and <sup>13</sup> C NMR spectra for <b>3bc</b> . |
| S10: | Copies of <sup>1</sup> H (400 MHz, CDCl <sub>3</sub> ) and <sup>13</sup> C NMR spectra for <b>3ca</b> . |
| S11: | Copies of <sup>1</sup> H (400 MHz, CDCl <sub>3</sub> ) and <sup>13</sup> C NMR spectra for <b>3cc</b> . |
| S12: | Copies of <sup>1</sup> H (400 MHz, CDCl <sub>3</sub> ) and <sup>13</sup> C NMR spectra for <b>3da</b> . |
| S13: | Copies of <sup>13</sup> C DEPT NMR of <b>3da</b> .                                                      |
| S14: | Copies of NOESY NMR of <b>3da</b> .                                                                     |
| S15: | Copies of HMQC NMR of <b>3da</b> .                                                                      |
| S16: | Copies of <sup>1</sup> H (400 MHz, CDCl <sub>3</sub> ) and <sup>13</sup> C NMR spectra for <b>3dc</b> . |
| S17: | Copies of <sup>1</sup> H (400 MHz, CDCl <sub>3</sub> ) and <sup>13</sup> C NMR spectra for <b>3ea</b> . |
| S18: | Copies of <sup>1</sup> H (400 MHz, CDCl <sub>3</sub> ) and <sup>13</sup> C NMR spectra for <b>3ec</b> . |
| S19: | Copies of <sup>1</sup> H (400 MHz, CDCl <sub>3</sub> ) and <sup>13</sup> C NMR spectra for <b>F</b> .   |

### General Experimental Methods

GLC analysis was performed with a flame ionization detector using a 0.22 mm × 25 m capillary column (BP-5).  $^1\text{H}$  and  $^{13}\text{C}$  NMR were measured at 400 and 100 MHz, respectively, in  $\text{CDCl}_3$  with  $\text{Me}_4\text{Si}$  as the internal standard. The products were characterized by  $^1\text{H}$  NMR,  $^{13}\text{C}$  NMR, NOESY, DEPT, HMQC, and GC-MS. The yields of products were estimated from the peak areas based on the internal standard technique using GLC.

**Reaction of 3-(1-Naphtylamino)-propanol (D) and 1a in the Presence of Ir catalyst (Eq. 2):** To a mixture of  $\text{IrCl}_3\cdot\text{H}_2\text{O}$  (18 mg, 0.05 mmol), BINAP (47 mg, 0.075 mmol), and  $\text{Na}_2\text{CO}_3$  (9 mg, 0.08 mmol) was added to the mixture of 3-(1-naphtylamino)-1-propanol (201 mg, 1 mmol) and **1a** (143 mg, 1 mmol) in mesitylene (1.5 mL) under  $\text{O}_2$  (1 atm). The reaction mixture was stirred at refluxing temperature of mesitylene (169 °C) for 15 h. GC analysis of the reaction mixture showed that **3aa** and **1a** was formed in 72% and 19% yields, respectively.

**Reaction of *N,N'*-di(naphthalene-1-yl)propane-1,3-diamine (E) in the Presence of Ir catalyst (Eq. 4):** To a mixture of  $\text{IrCl}_3\cdot\text{H}_2\text{O}$  (35 mg, 0.10 mmol), BINAP (93 mg, 0.15 mmol), and  $\text{Na}_2\text{CO}_3$  (17 mg, 0.16 mmol) was added to *N,N'*-di(naphthalene-1-yl)propane-1,3-diamine (**E**) (326 mg, 1 mmol) in mesitylene (1.5 mL) under  $\text{O}_2$  (1 atm). The reaction mixture was stirred at refluxing temperature of mesitylene (169 °C) for 15 h. GC analysis of the reaction mixture showed that **3aa** and **1a** was formed in 76% and 83% yield, respectively.

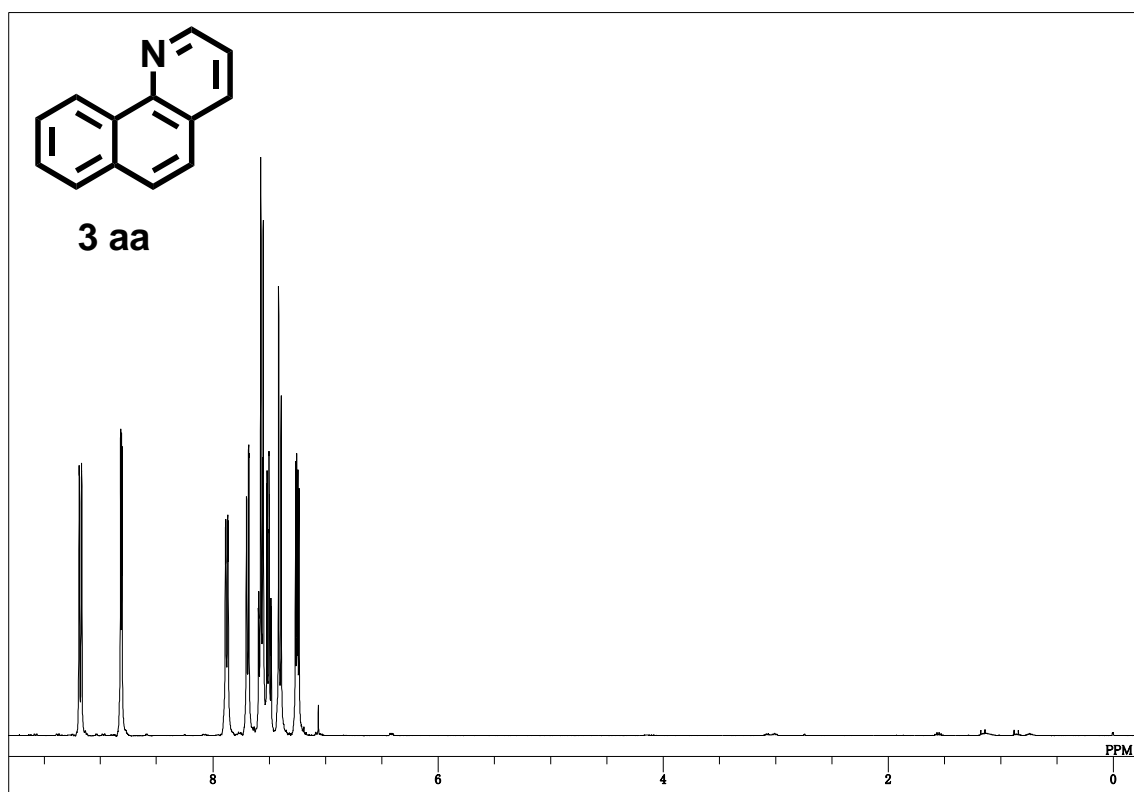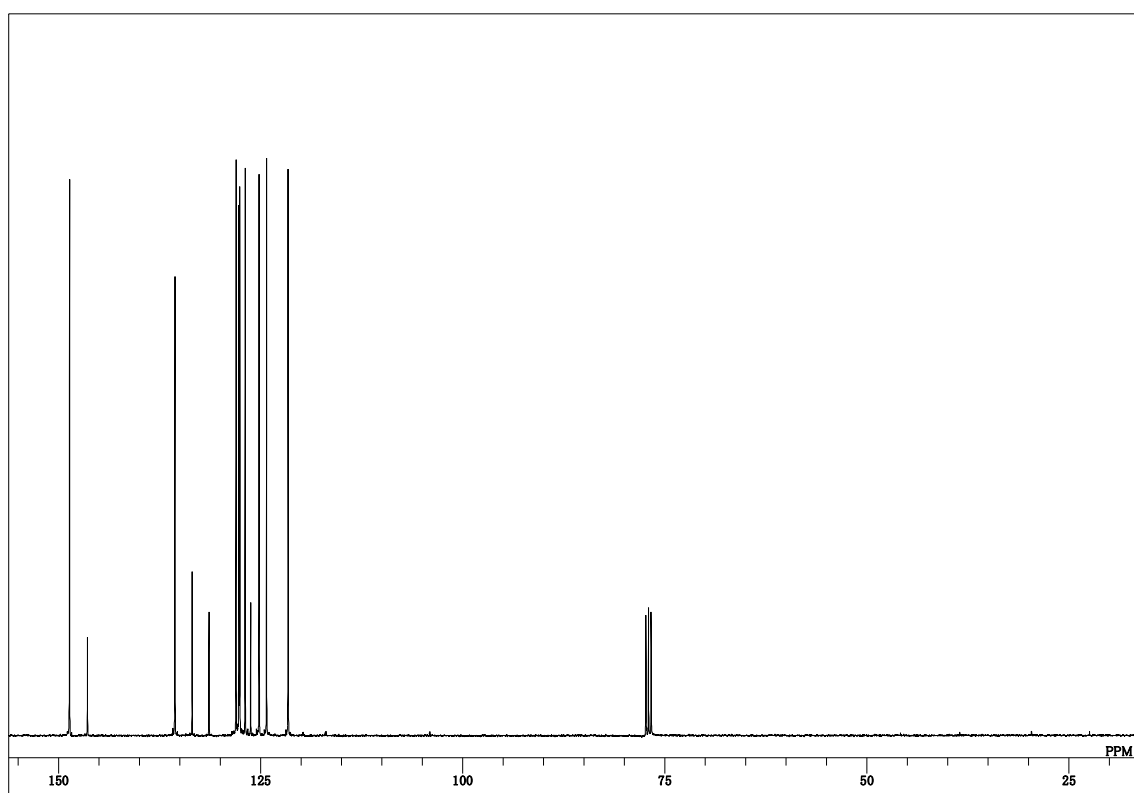

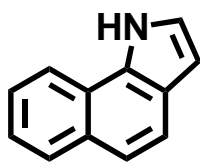

3 ab

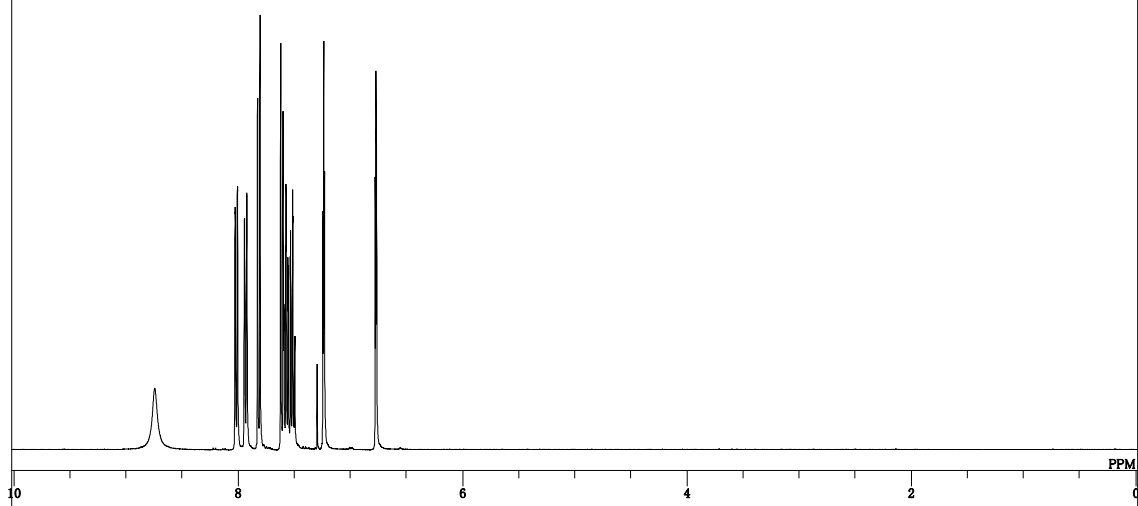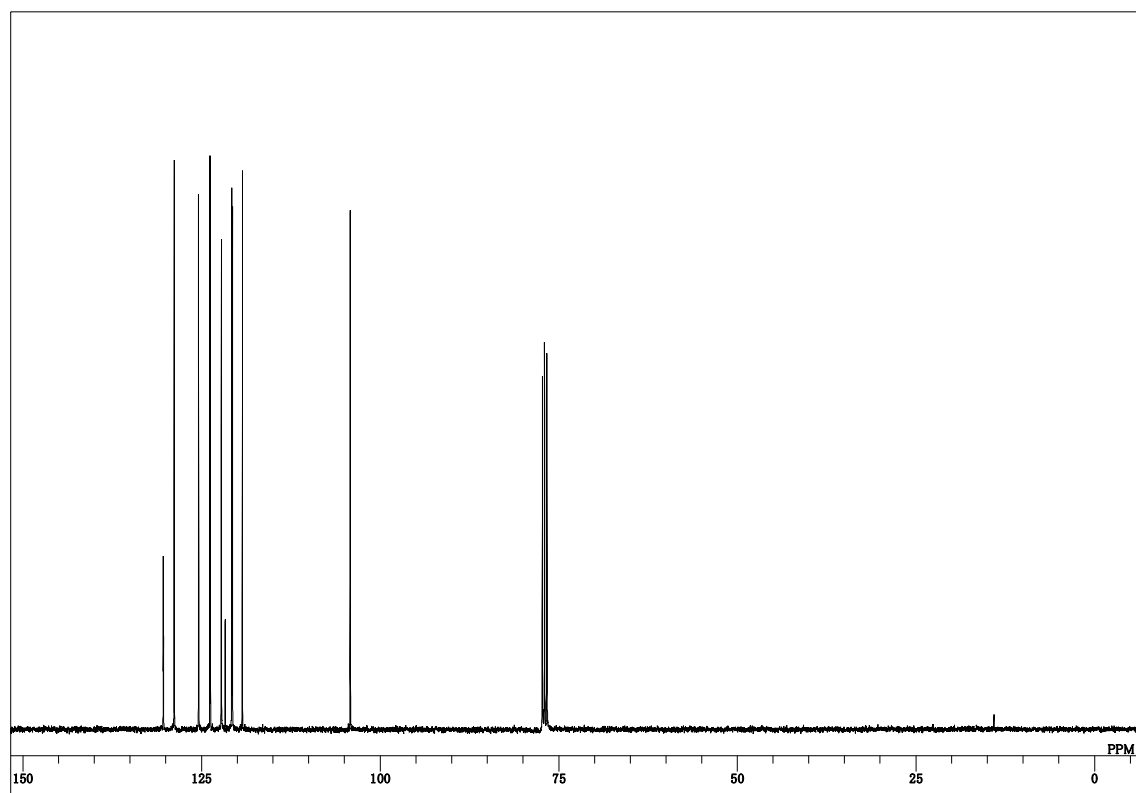

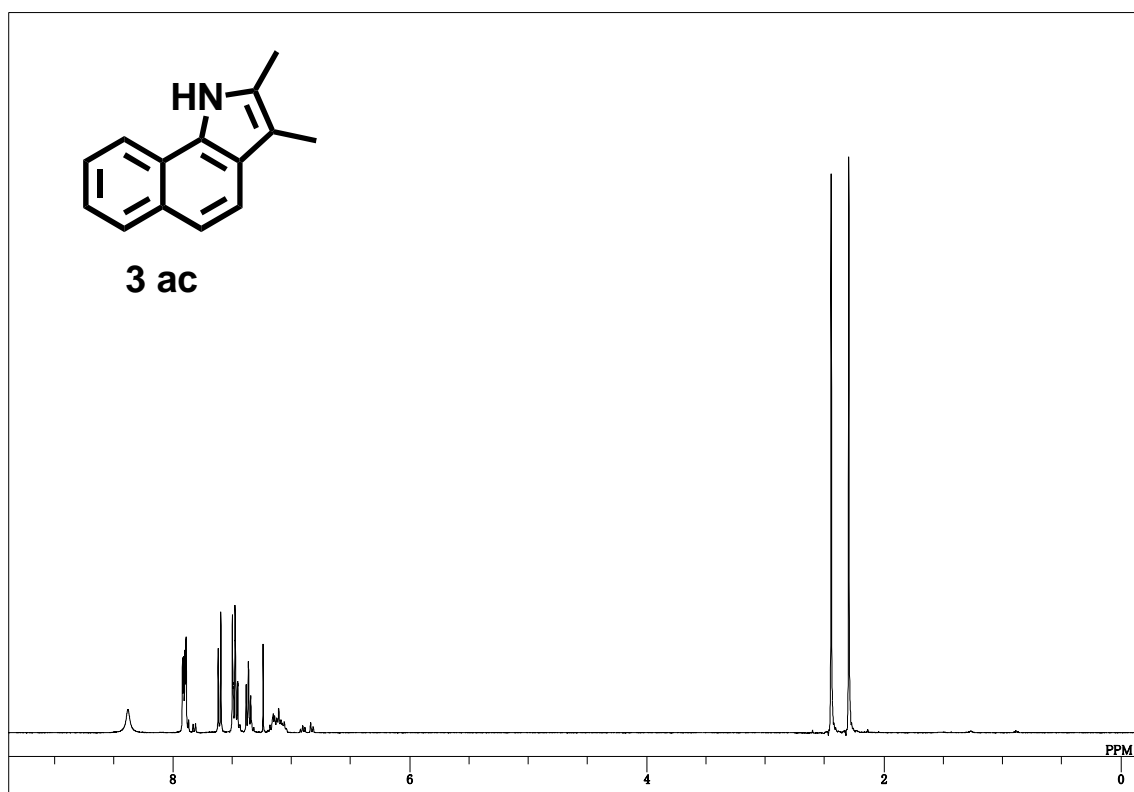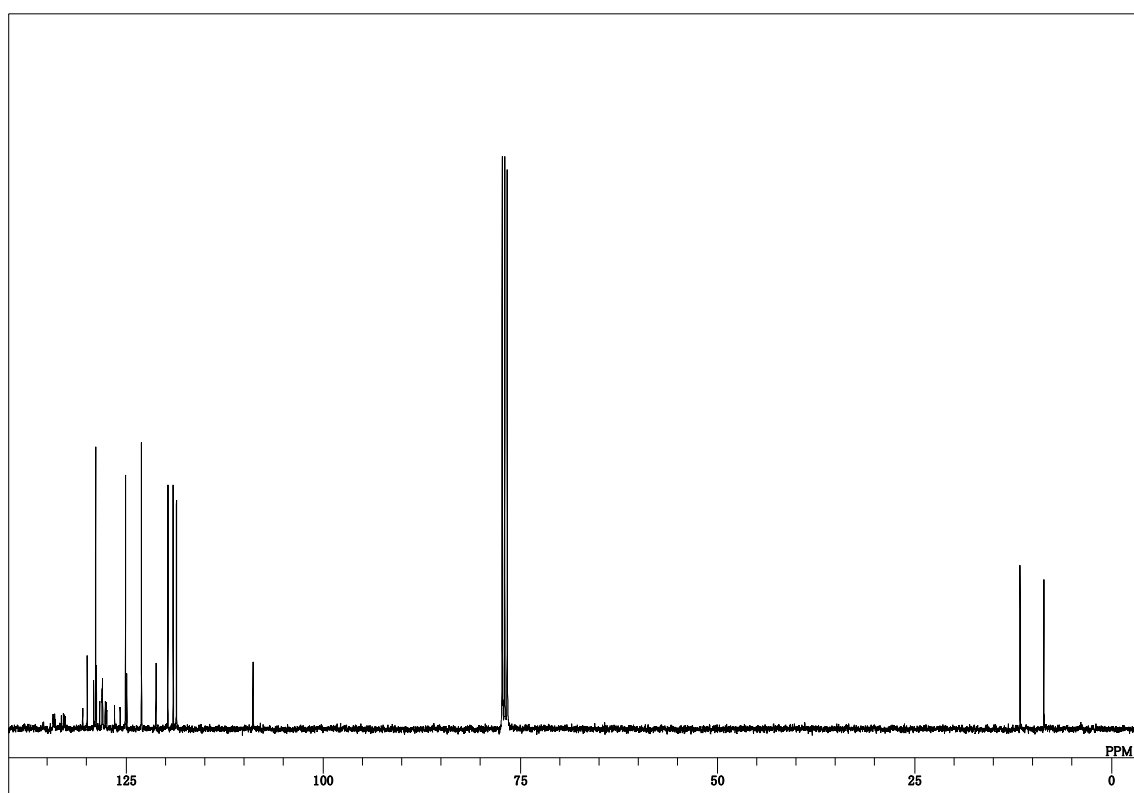

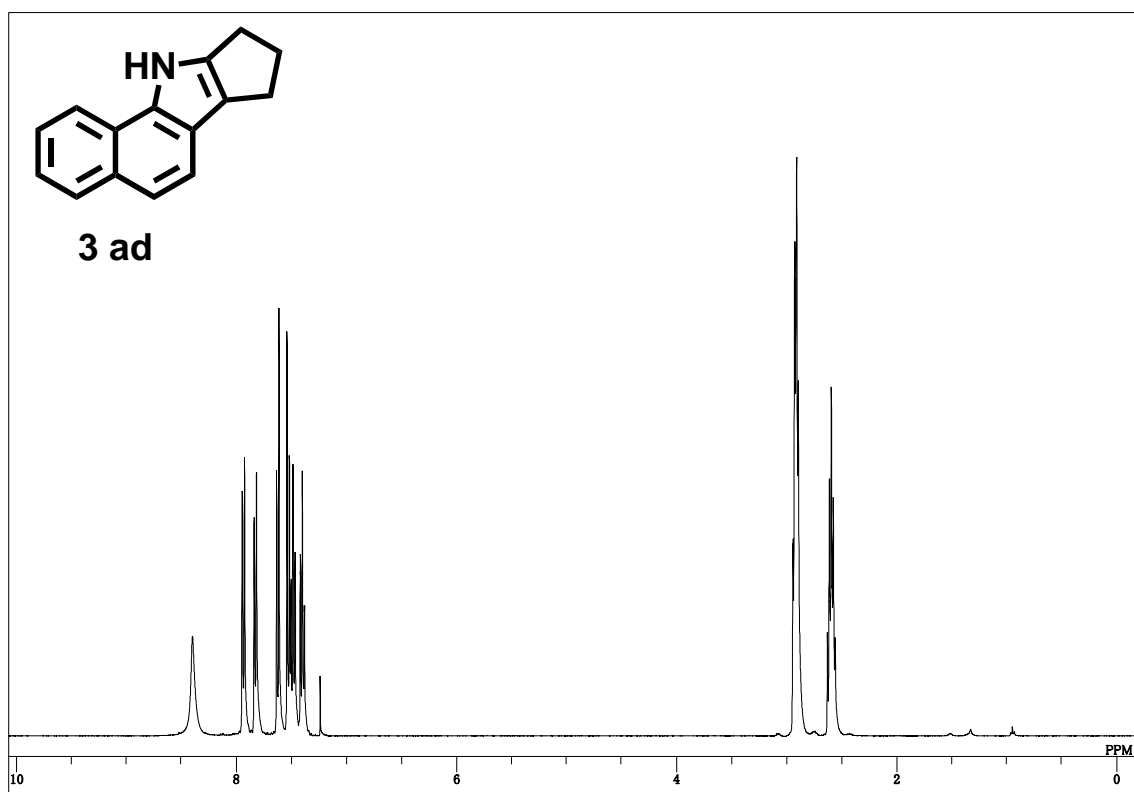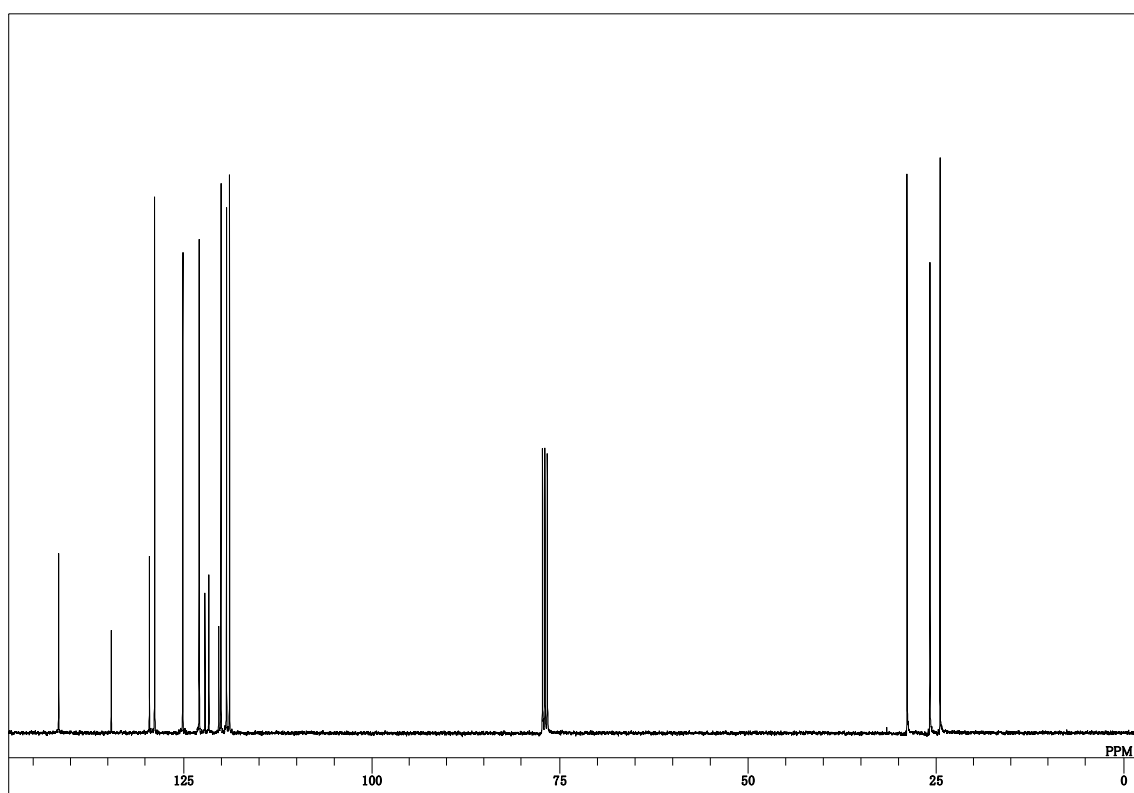

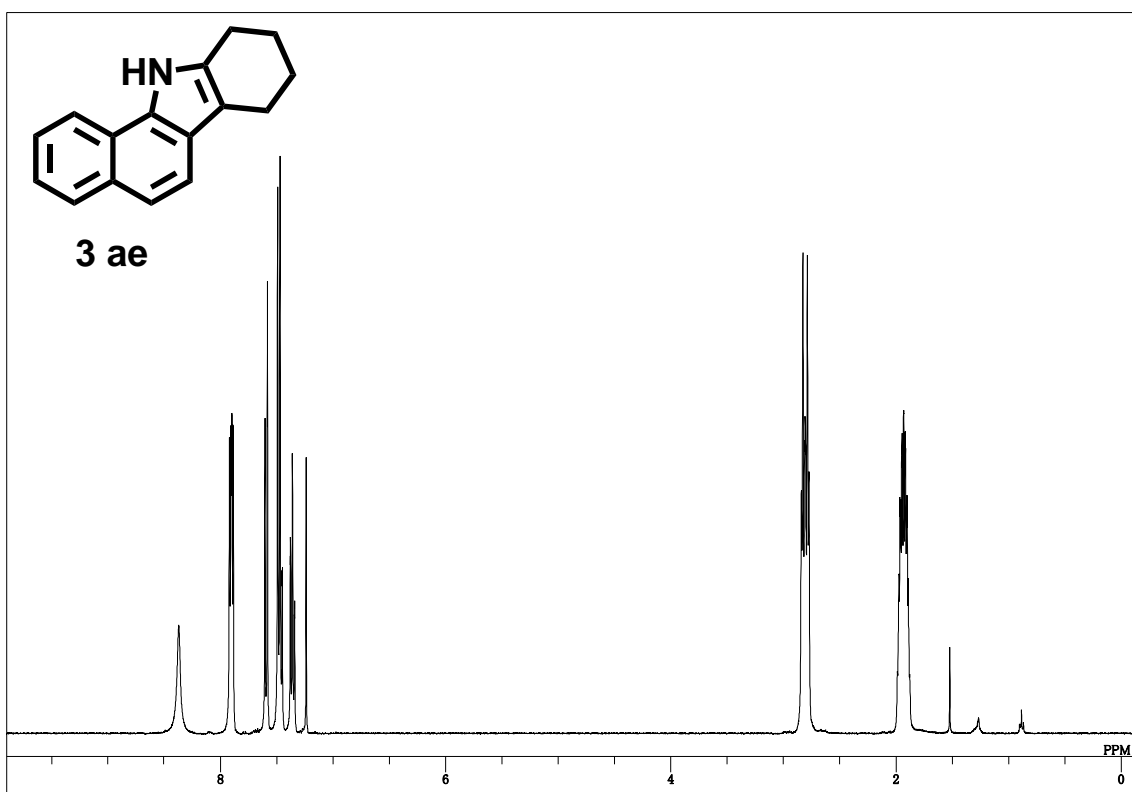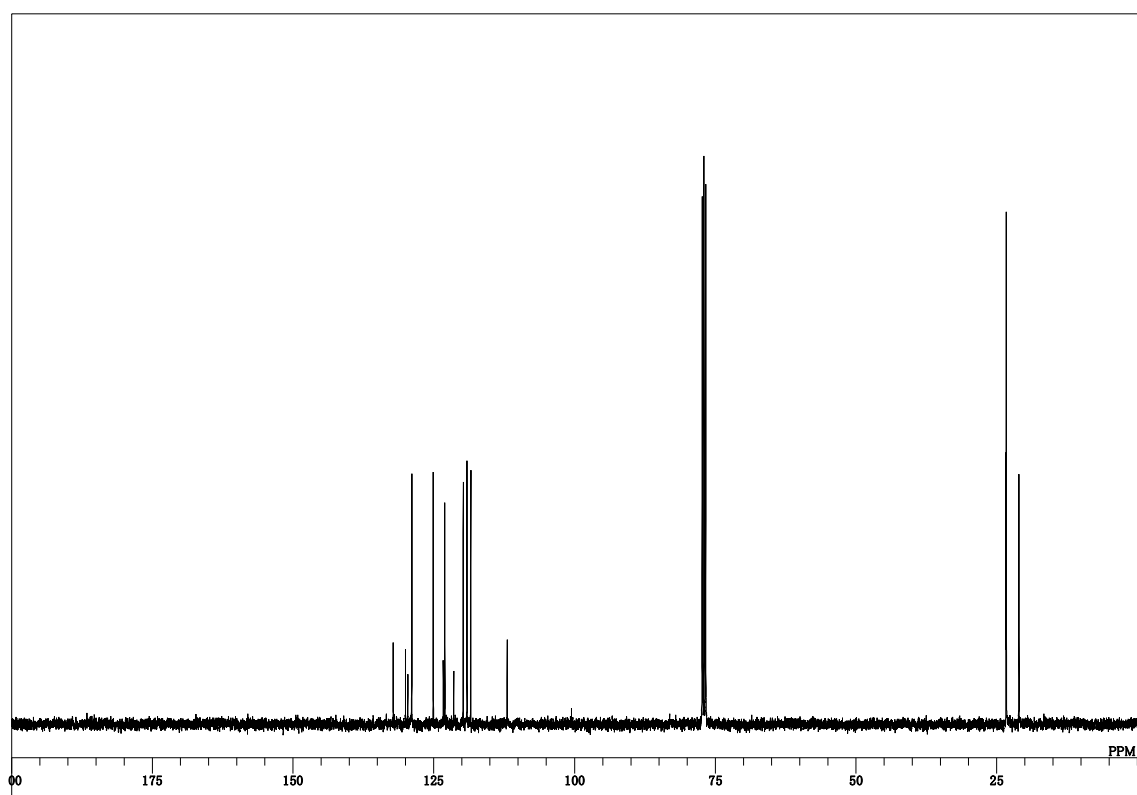

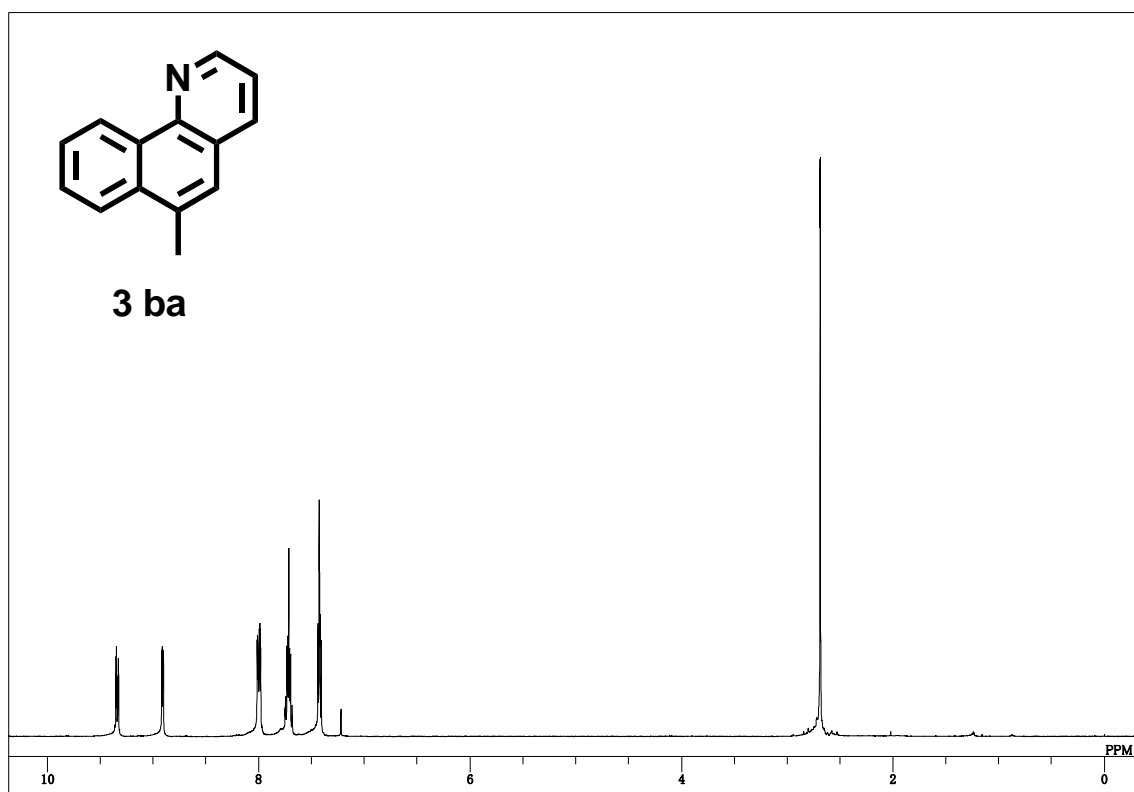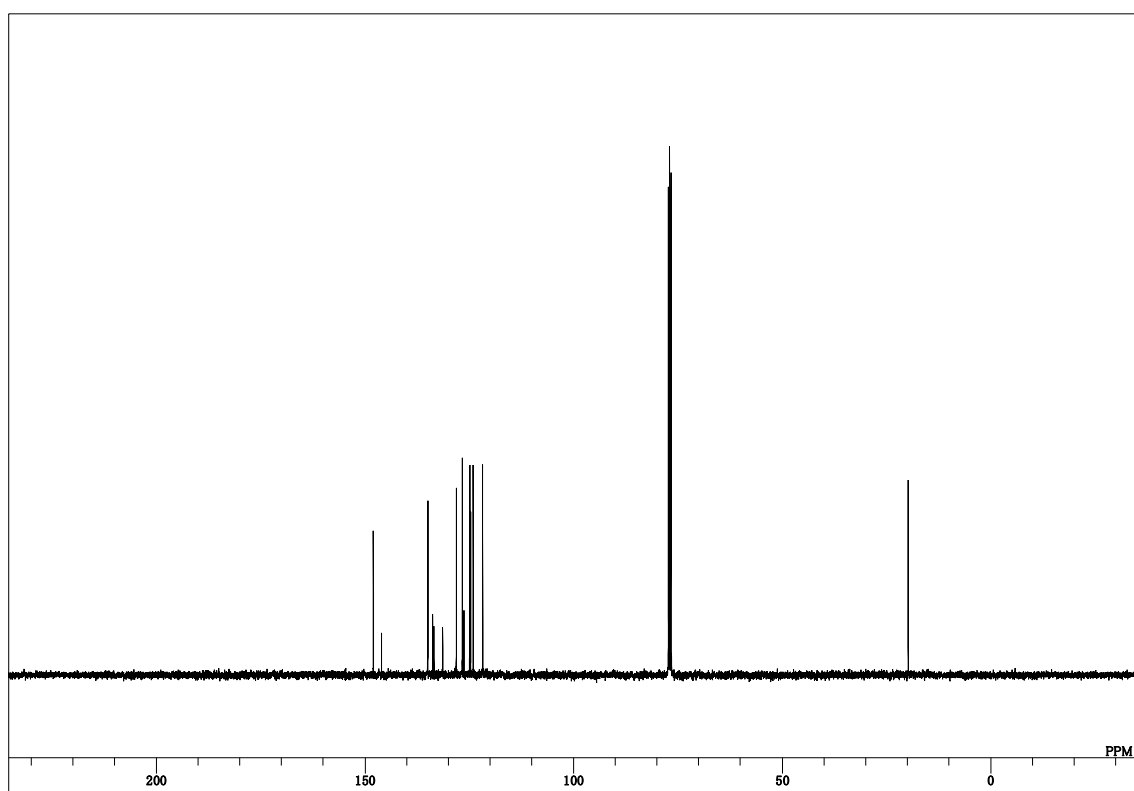



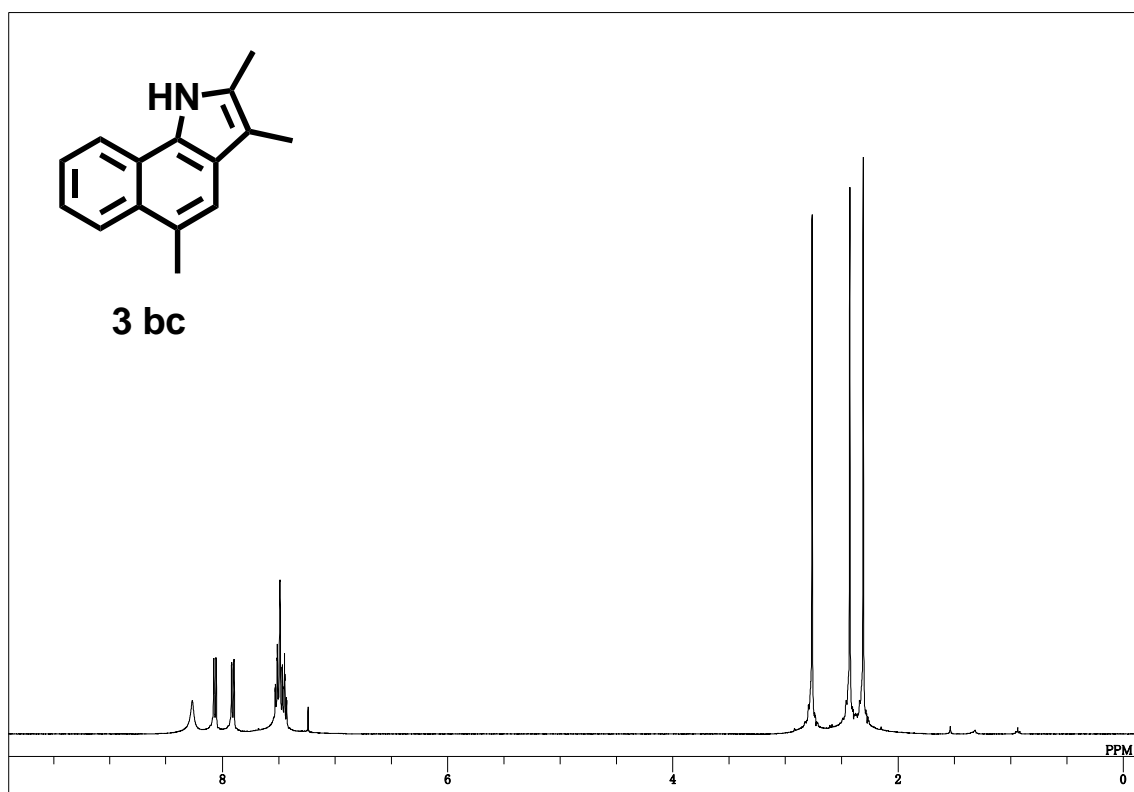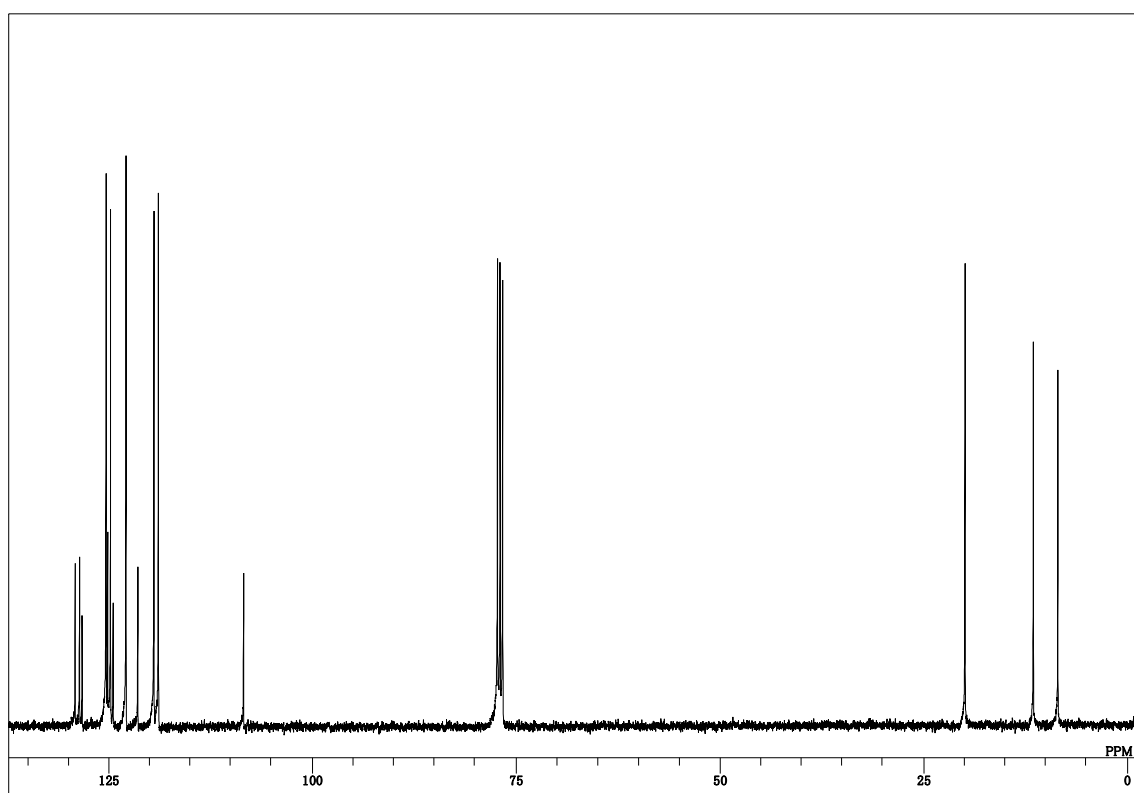

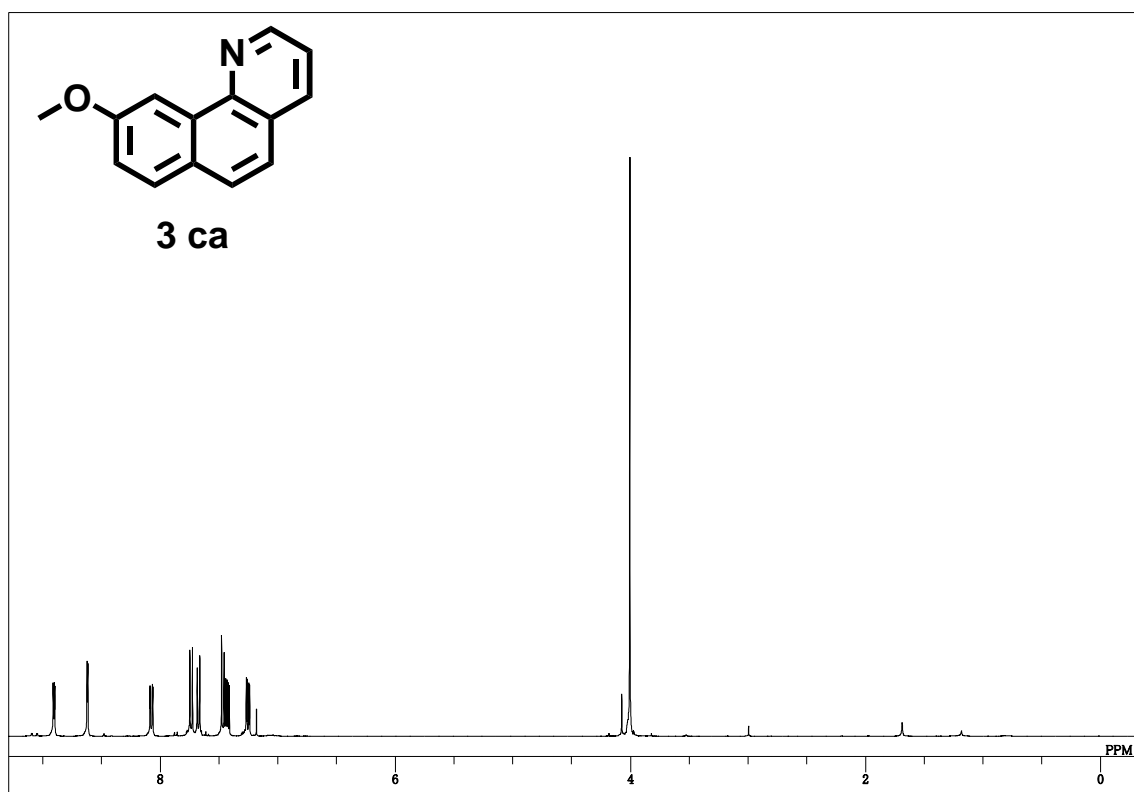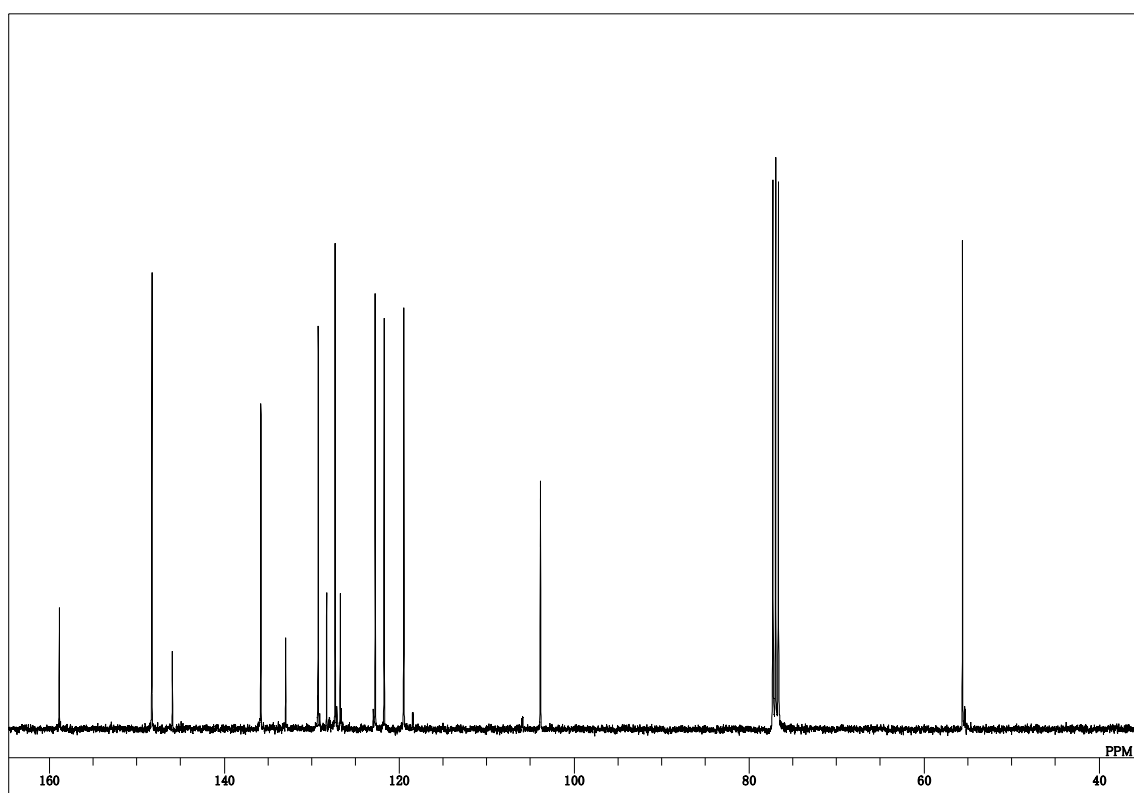

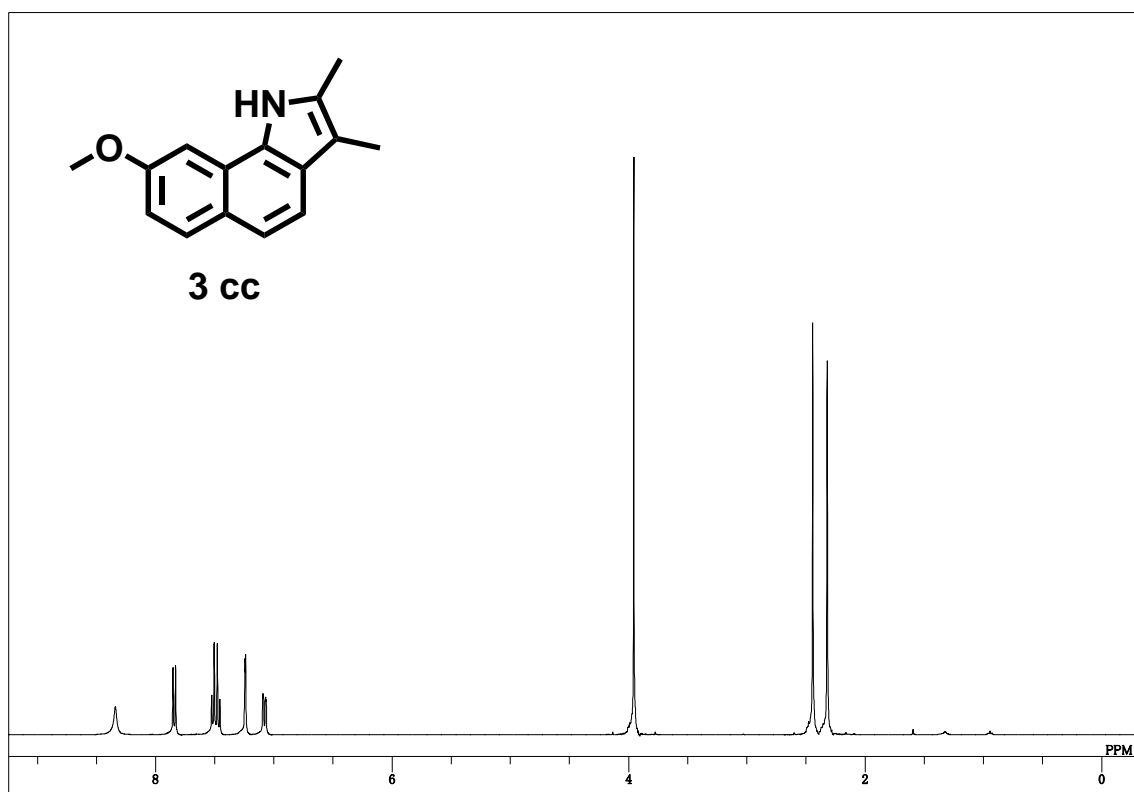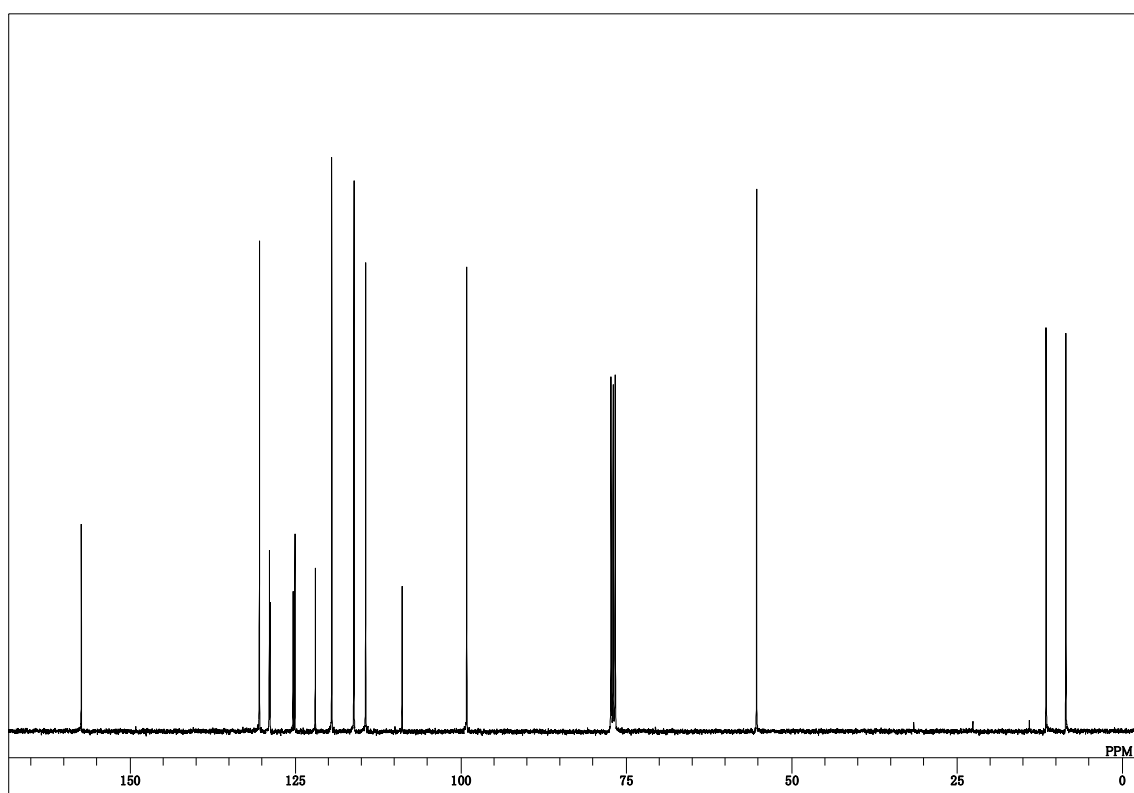

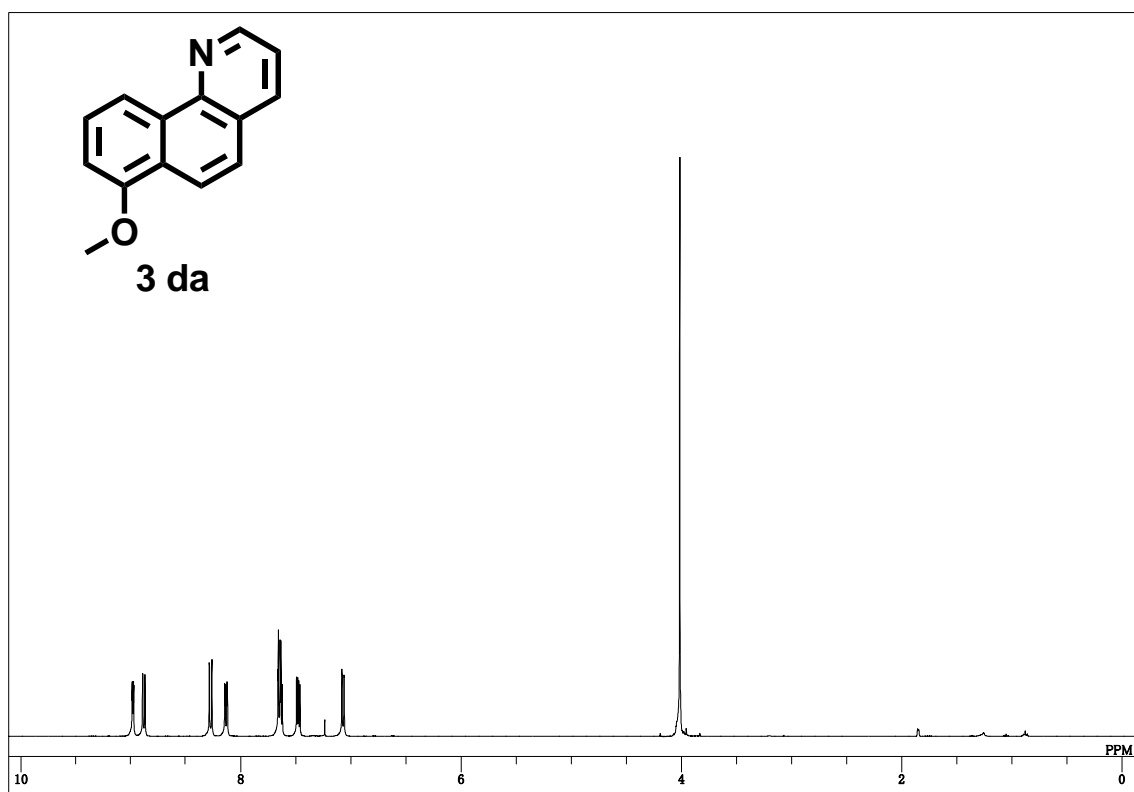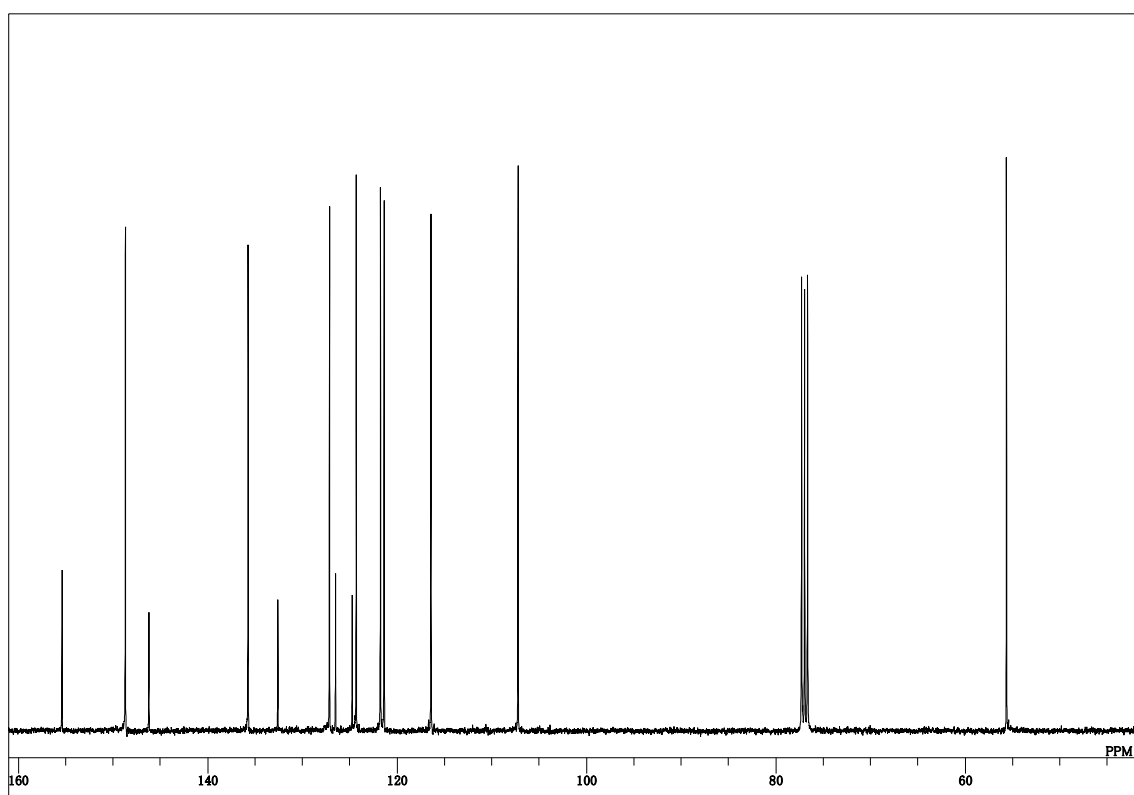

DEPT

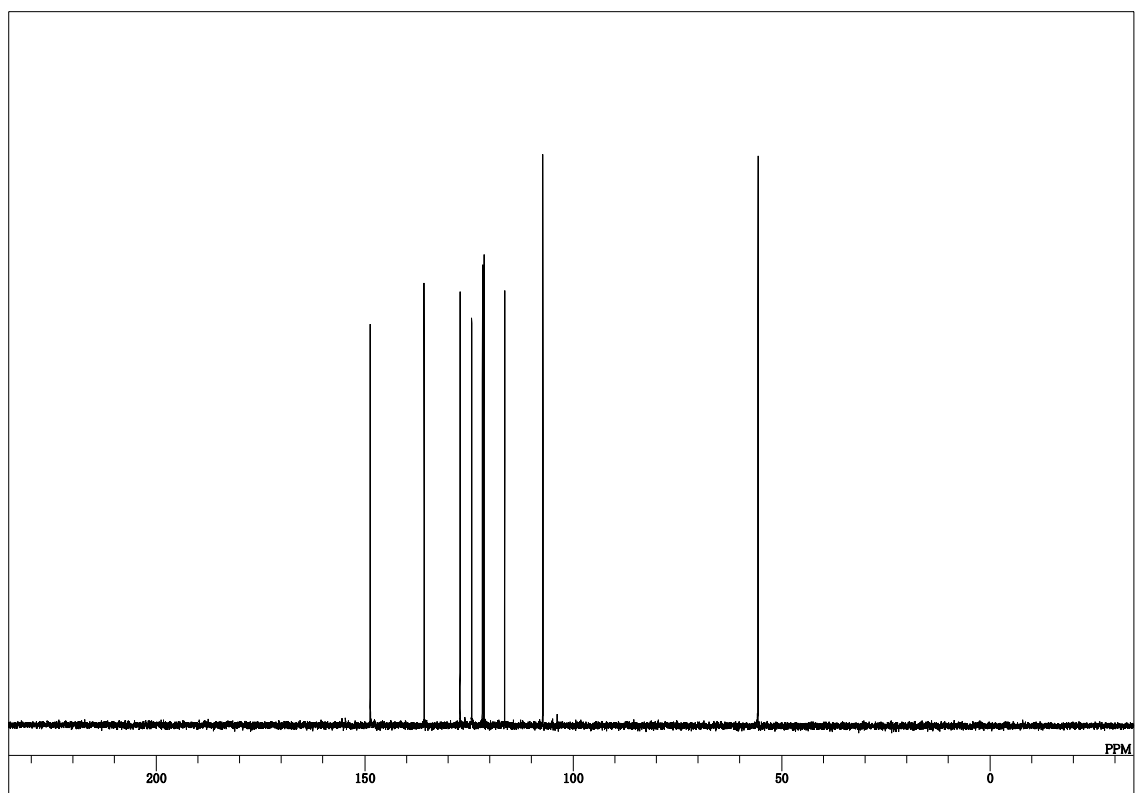

NOESY

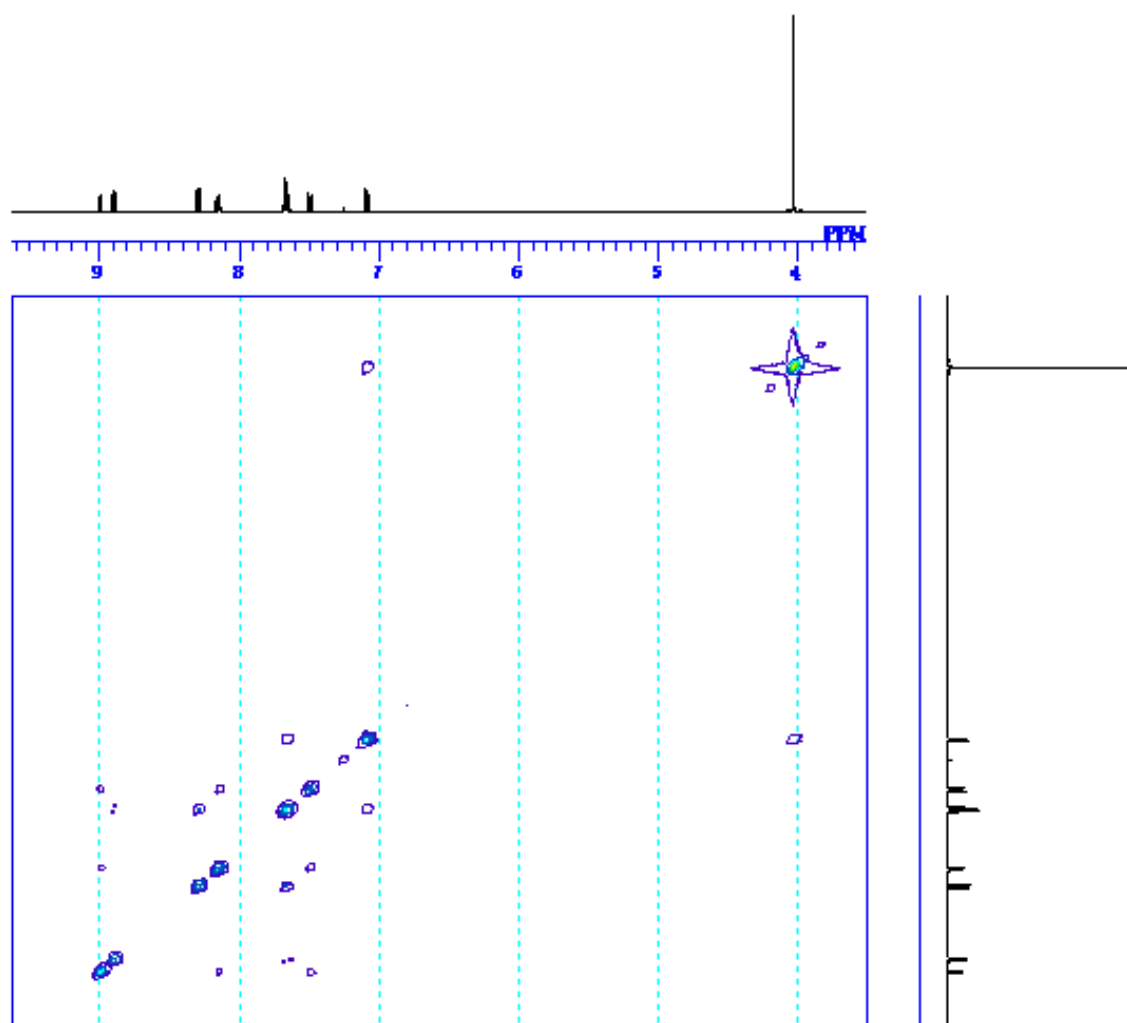

HMQC

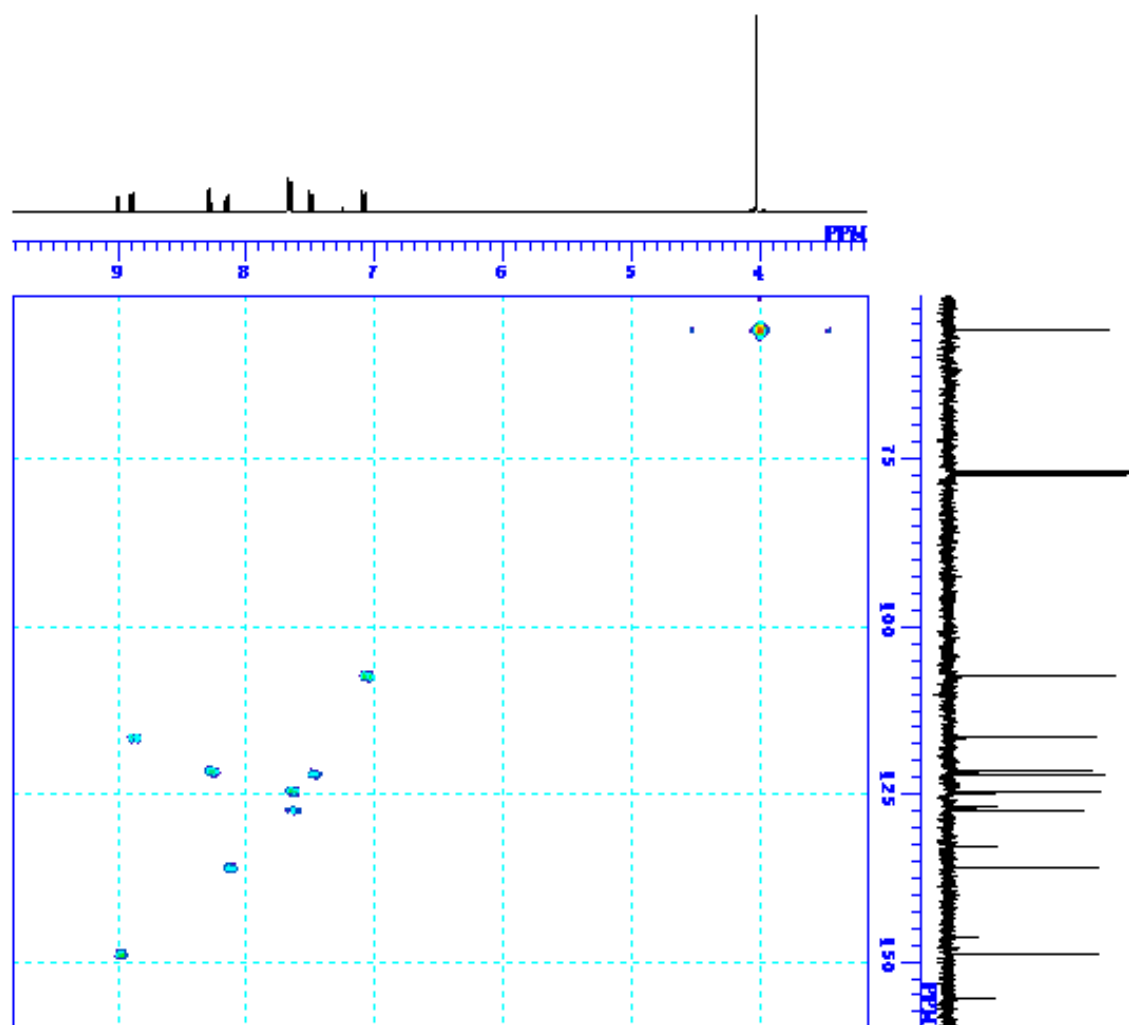

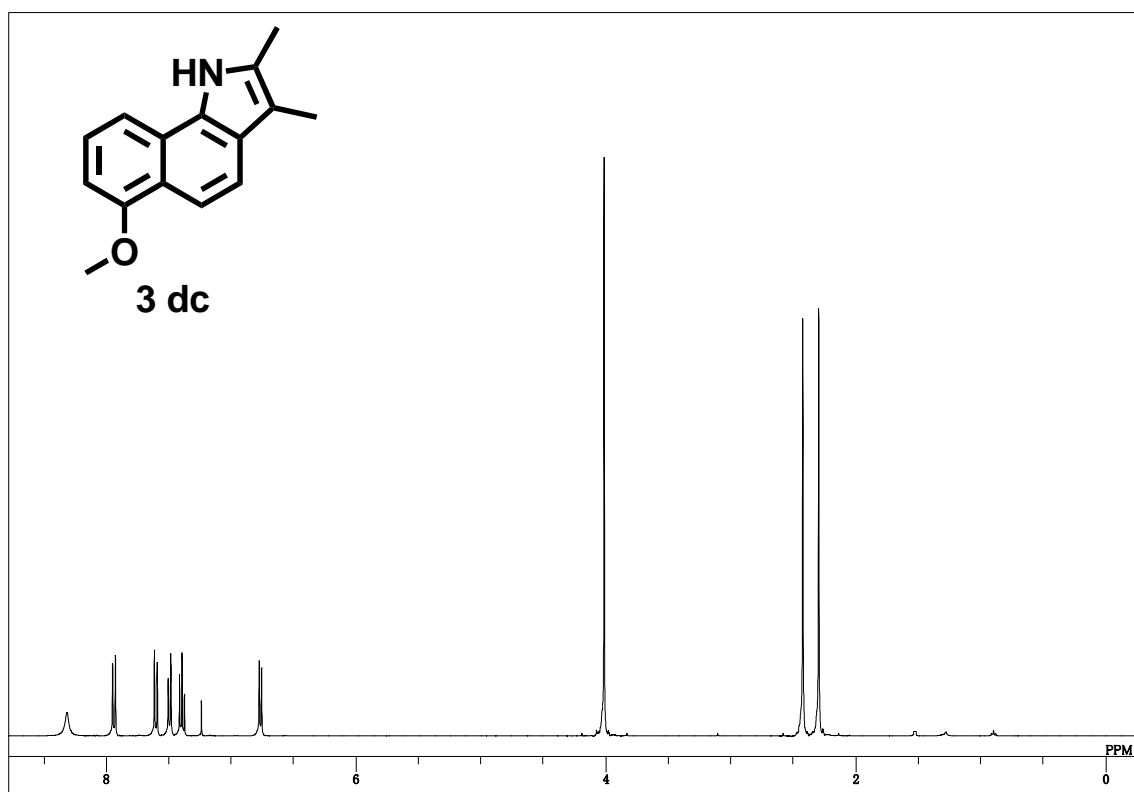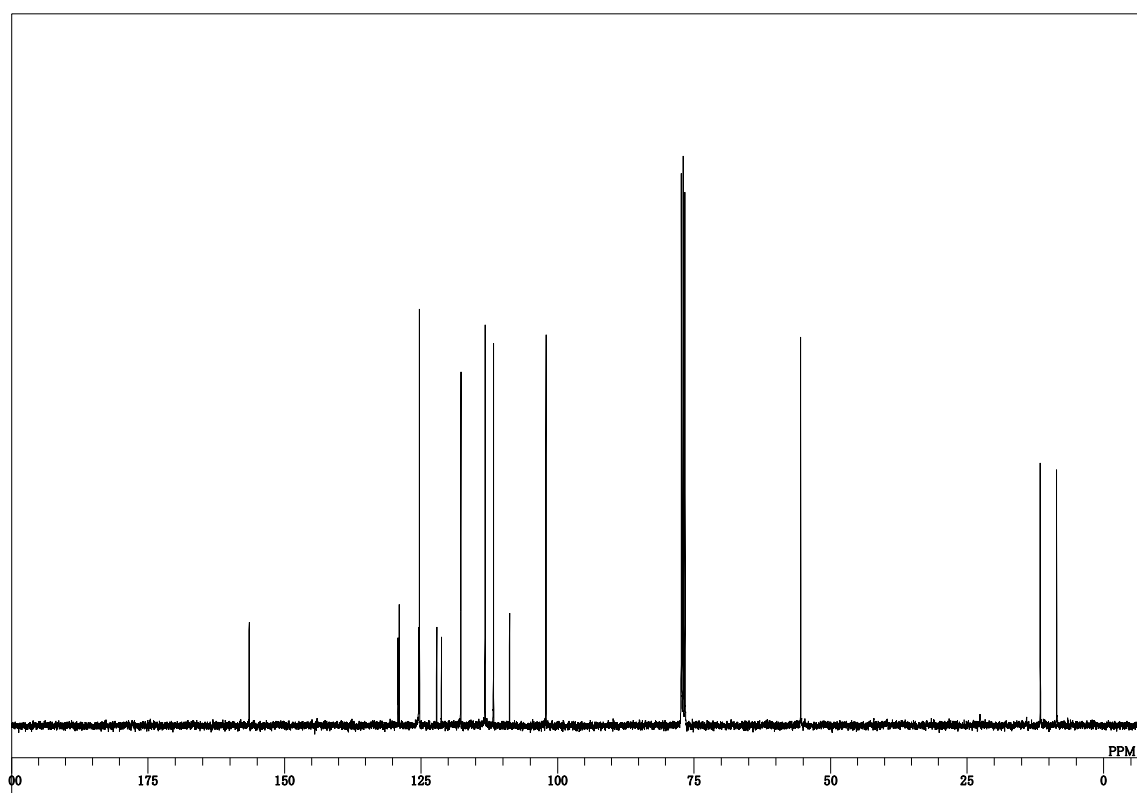



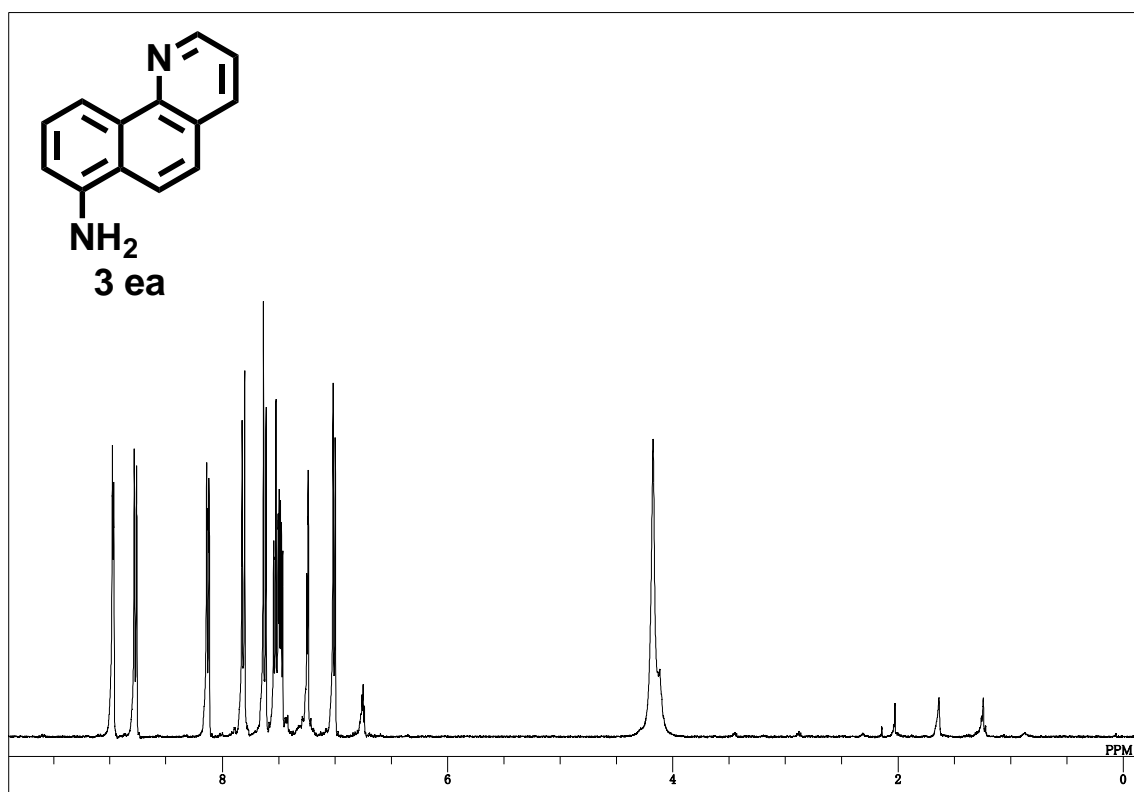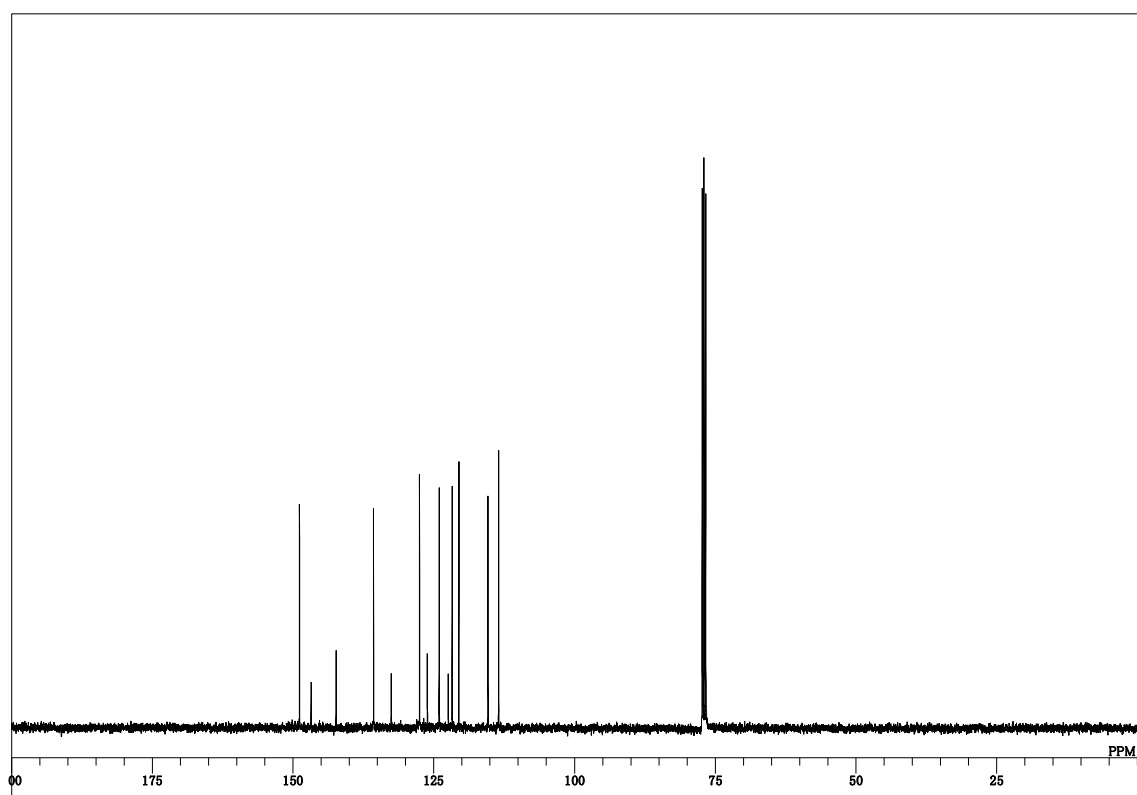

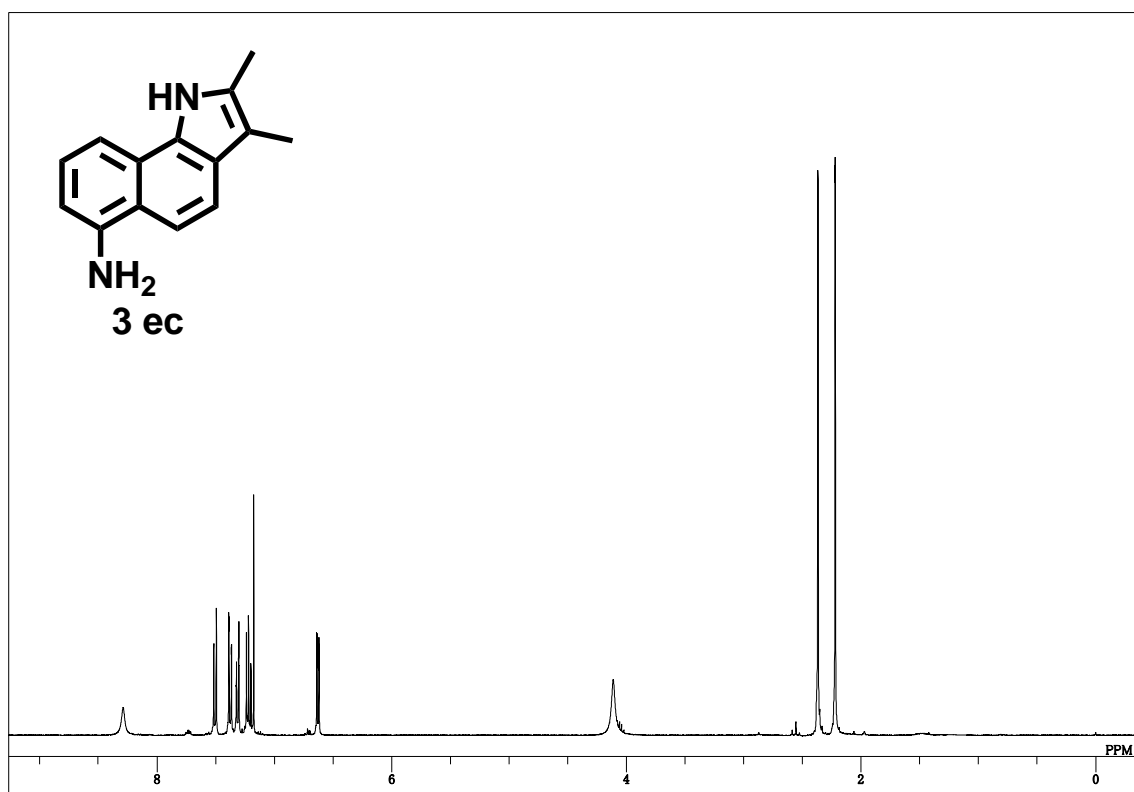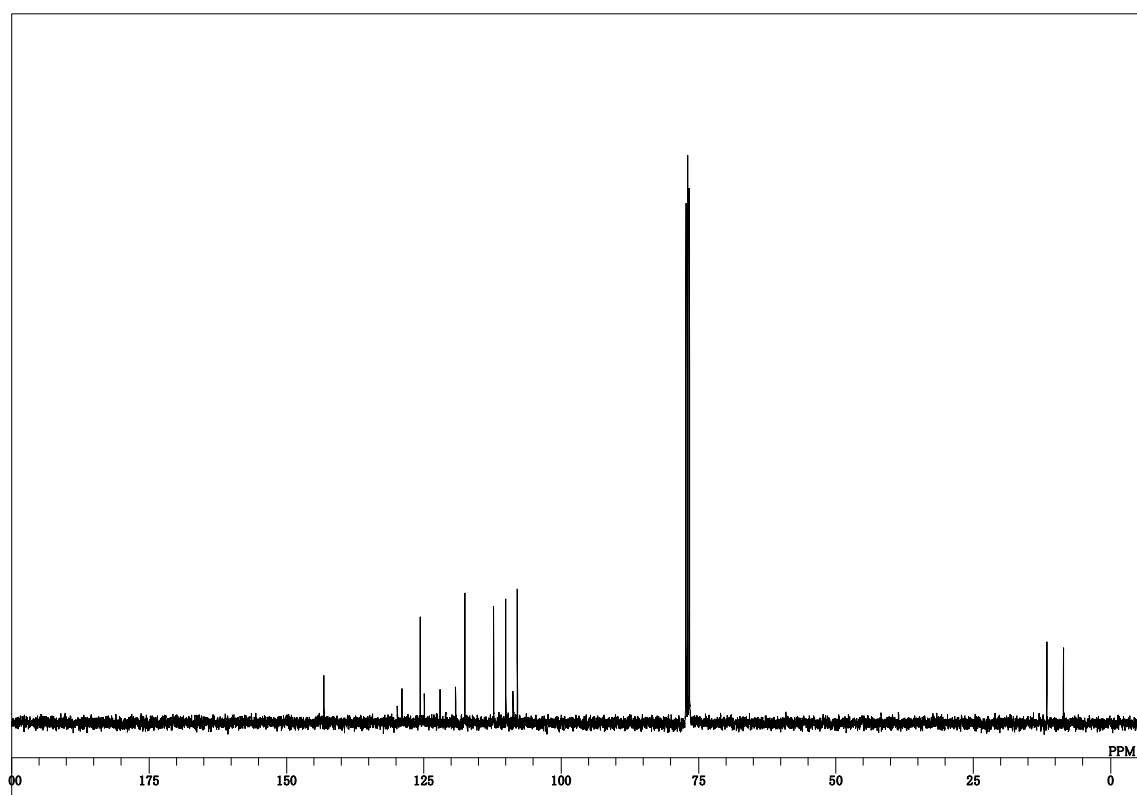

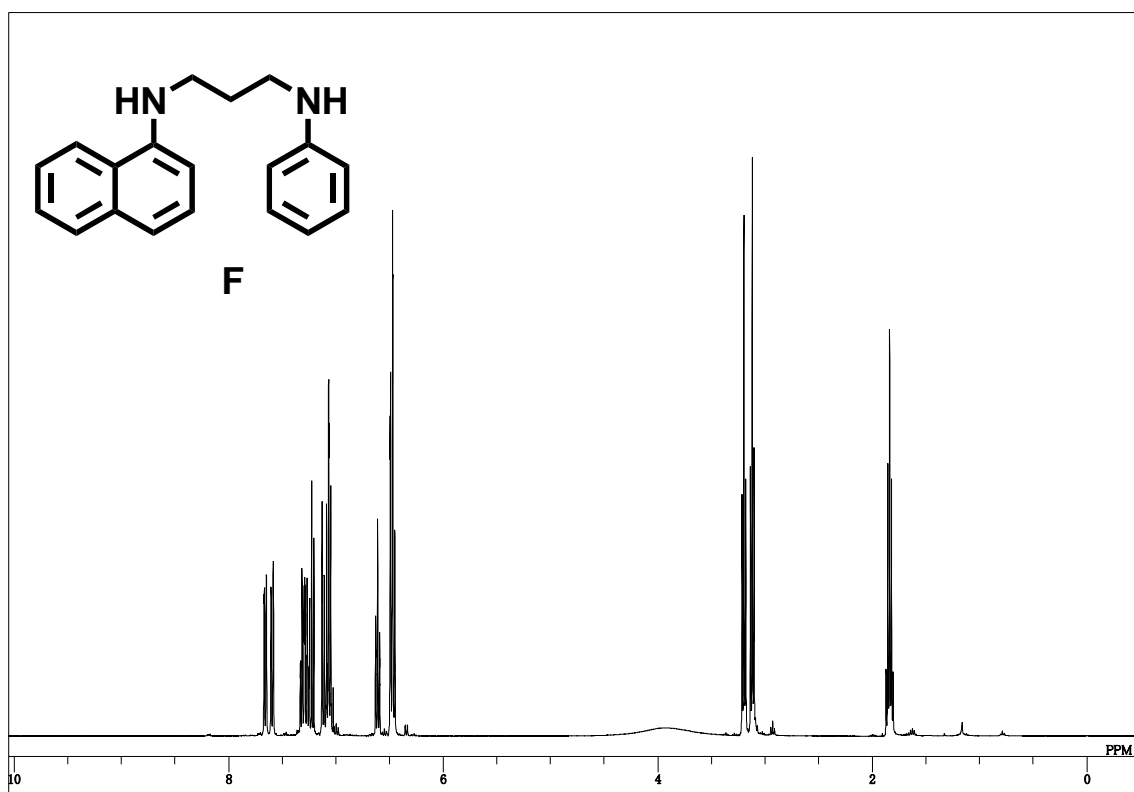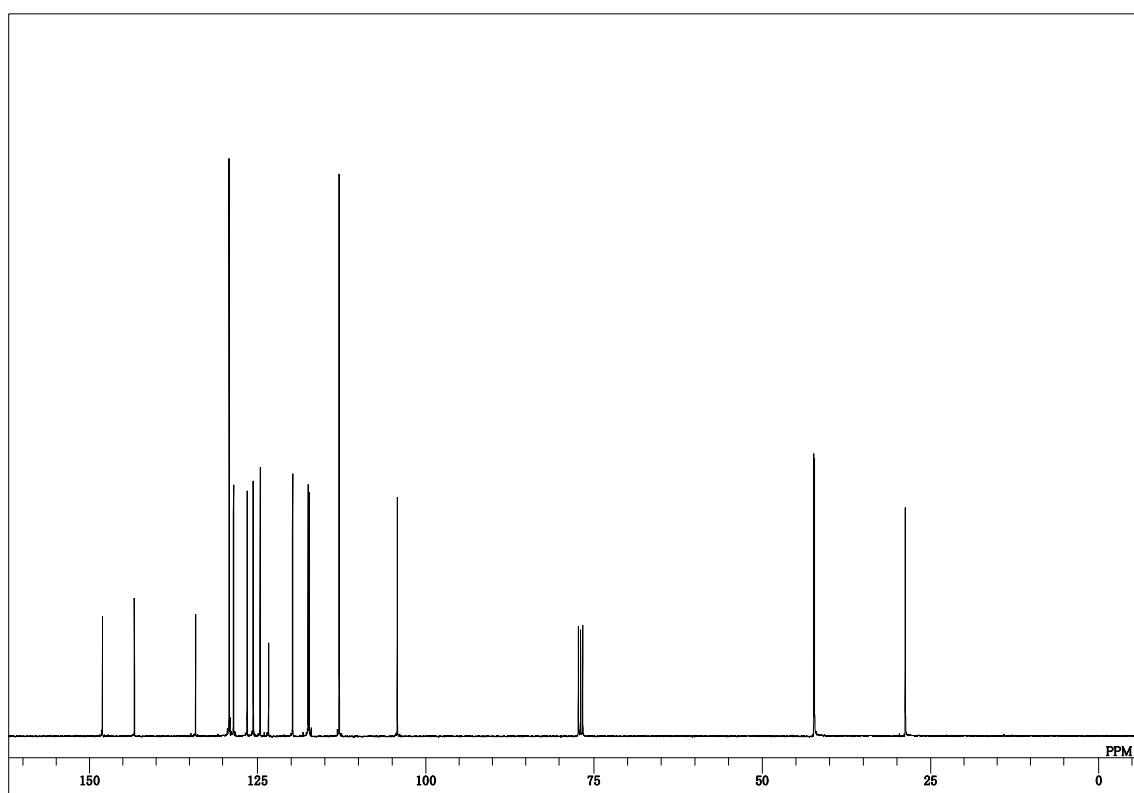

Supplement: Supplementary file 1 [file 4582699]
